# Supplementary material for: A Novel, Apparently Silent Variant in MFSD8 Causes Neuronal Ceroid Lipofuscinosis with Marked Intrafamilial Variability
Source: MDPI journal article supplement (doi:10.3390/ijms23042271), 2022-02-18
Supplement: s1 [file s1]

| <b>Supplementary Table S1:</b> <i>In silico</i> splice site predictions from four algorithms for the c.750A>G variant |          |            |          |           |
|-----------------------------------------------------------------------------------------------------------------------|----------|------------|----------|-----------|
| Program                                                                                                               | NNSplice | MaxEntScan | SSF-like | SpliceAI* |
| Score range                                                                                                           | [0-1]    | [0-12]     | [0-100]  | [0-1]     |
| Threshold                                                                                                             | ≥0.4     | ≥0         | ≥70      | ≥0.5      |
| Score                                                                                                                 | 0.9      | 8.4        | 76.5     | 0.45      |
| Score change**                                                                                                        | (± 0 %)  | (± 0 %)    | (± 0 %)  |           |
| *SpliceAI prediction is given as Δscore (difference between reference and mutant score); **compared with wildtype.    |          |            |          |           |

| <b>Supplementary Table S2:</b> Results of HSF disclosing the effect of the c.750A>G variant on splice enhancers and silencers |                                                        |          |
|-------------------------------------------------------------------------------------------------------------------------------|--------------------------------------------------------|----------|
| Signal                                                                                                                        | Interpretation                                         |          |
| Alteration of auxiliary sequences                                                                                             | Significant alteration of ESE / ESS motifs ratio (-10) |          |
| Name                                                                                                                          | Position                                               | Sequence |
| RESCUE ESE (ESE Site Broken)                                                                                                  | chr4:127938787                                         | AGAAGG   |
| EIE (ESE Site Broken)                                                                                                         | chr4:127938787                                         | AGAAGG   |
| ESE_Tra2 (ESE Site Broken)                                                                                                    | chr4:127938788                                         | AAGAA    |
| ESS_hnRNPA1 (New ESS Site)                                                                                                    | chr4:127938789                                         | GAGGAA   |
| Sironi_motif1 (ESS Site Broken)                                                                                               | chr4:127938789                                         | GAAGAAGG |
| PESE (ESE Site Broken)                                                                                                        | chr4:127938789                                         | GAAGAAGG |
| ESE_SRp55 (New ESE Site)                                                                                                      | chr4:127938790                                         | TGAGGA   |
| RESCUE ESE (ESE Site Broken)                                                                                                  | chr4:127938790                                         | TGAAGA   |
| Sironi_motif2 (New ESS Site)                                                                                                  | chr4:127938790                                         | TGAGGAA  |
| PESE (ESE Site Broken)                                                                                                        | chr4:127938790                                         | TGAAGAAG |
| PESE (New ESE Site)                                                                                                           | chr4:127938790                                         | TGAGGAAG |
| RESCUE ESE (ESE Site Broken)                                                                                                  | chr4:127938791                                         | TTGAAG   |
| PESE (ESE Site Broken)                                                                                                        | chr4:127938791                                         | TTGAAGAA |
| EIE (ESE Site Broken)                                                                                                         | chr4:127938792                                         | TTTGAA   |
| Sironi_motif2 (New ESS Site)                                                                                                  | chr4:127938792                                         | TTTGAGG  |
| Sironi_motif1 (New ESS Site)                                                                                                  | chr4:127938792                                         | TTTGAGGA |

**Supplementary Table S3:** EX-SKIP comparison of the predicted numbers of ESSs and ESEs identified within the junction between *MFSD8* exon 8-intron 8 and their ratio for both reference and mutant sequences

| Seq | PESS (count) | FAS-ESS hex2 (count) | FAS-ESS hex3 (count) | IIE (count) | IIE (sum) | NI-ESS trusted (count) | NI-ESS all (sum) | PESE (count) | RESCUE -ESE (count) | EIE (count) | EIE (sum) | NI-ESE trusted (count) | NI-ESE all (sum) | ESS (total) | ESE (total) | ESS/ESE (ratio) |
|-----|--------------|----------------------|----------------------|-------------|-----------|------------------------|------------------|--------------|---------------------|-------------|-----------|------------------------|------------------|-------------|-------------|-----------------|
| WT  | 0            | 0                    | 0                    | 3           | 54.7993   | 0                      | -0.6639          | 2            | 4                   | 4           | 106.1529  | 4                      | 4.6351           | 3           | 14          | <b>0.21</b>     |
| MUT | 0            | 0                    | 0                    | 3           | 58.4170   | 0                      | -0.6639          | 1            | 2                   | 3           | 31.3720   | 4                      | 4.2449           | 3           | 10          | <b>0.30</b>     |

Verdict: The mutant allele has a higher chance of exon skipping than the wildtype allele.

**Supplementary Table S4:** SpliceAid analysis of RNA target motifs bound by splicing proteins in the reference or c.750A>G *MFSD8* sequences using the junction between exon 8-intron 8 as an input

Binding sites present ONLY in the first (WILD-TYPE) sequence

| Position | Protein Name | Recognized Sequence | Score | Protein Notes                                                                                                                                                                | PubMed ID | Reference                                                                                                                                                                                                                                                                                                    | Gene/Construct (Target RNA)                                                                                                           | Splicing Assay                                       | Binding Assay                                                                                                                                     |
|----------|--------------|---------------------|-------|------------------------------------------------------------------------------------------------------------------------------------------------------------------------------|-----------|--------------------------------------------------------------------------------------------------------------------------------------------------------------------------------------------------------------------------------------------------------------------------------------------------------------|---------------------------------------------------------------------------------------------------------------------------------------|------------------------------------------------------|---------------------------------------------------------------------------------------------------------------------------------------------------|
| 71-76    | HTra2beta1   | GAAGAA              | 10    | Gene Name and Synonymous: SFRS10, splicing factor arginine/serine-rich 10 (transformer 2 homolog, Drosophila), TRA2B, SRF510, TRAN2B, TRA2-BETA, Htra2-beta, DKFZp686F18120. | 20926394  | Tsuda K, Someya T, Kuwasako K, Takahashi M, He F, Unzai S, Inoue M, Harada T, Watanabe S, Terada T, Kobayashi N, Shirouzu M, Kigawa T, Tanaka A, Sugano S, Güntert P, Yokoyama S, Muto Y. (2010) Structural basis for the dual RNArecognition modes of human Tra2-8 RRM. Nucleic Acids Res. 39(4):1538-1553. | Synthesized sequences                                                                                                                 |                                                      | NMR spectroscopy                                                                                                                                  |
| 72-76    | HTra2beta1   | AAGAA               | 7     | Gene Name and Synonymous: SFRS10, splicing factor arginine/serine-rich 10 (transformer 2 homolog, Drosophila), TRA2B, SRF510, TRAN2B, TRA2-BETA, Htra2-beta, DKFZp686F18120. | 9546399   | Tacke R, Tohyama M, Ogawa S, Manley JL. (1998) Human Tra2 proteins are sequence-specific activators of premRNA splicing. Cell. 93(1): 139-148.                                                                                                                                                               | Sequences of 20 nt random for SELEX. Sequence of beta-globin [3043] and constructs of murine IgM-based premRNA for in vitro splicing. | In vitro splicing in HeLa S100 and nuclear extracts. | SELEX of 20nt random with recombinant protein, confirmed by EMSA in HeLa nuclear extract and S100. EMSA with recombinant protein.                 |
| 72-77    | SRp54        | AAGAAG              | -5    | Gene Name and Synonymous: SFRS11, splicing factor, arginine/serine-rich 11, p54.                                                                                             | 16943417  | Wu JY, Kar A, Kuo D, Yu B, Havlioglu N. (2006) SRp54 (SFRS11), a regulator for tau exon 10 alternative splicing identified by an expression cloning strategy. Mol Cell Biol. 26(18):6739-6747.                                                                                                               | Construct of Tau MAPT [4137] EX9 - INT9 - EX10 - INT10 - EX11 with GFP cDNA inserted into EX11.                                       | In vivo splicing in HEK293.                          | Positive clones identified by fluorescenceactivated cell sorting and visual inspection. Confirmed by UV crosslink, immunoprecipitation, SDS-PAGE. |
| 72-77    | HTra2beta1   | HTra2beta1 AAGAAG   | 5     | Gene Name and Synonymous: SFRS10, splicing factor arginine/serine-rich 10 (transformer 2 homolog, Drosophila), TRA2B, SRF510, TRAN2B, TRA2-BETA, Htra2-beta, DKFZp686F18120. | 16943417  | Wu JY, Kar A, Kuo D, Yu B, Havlioglu N. (2006) SRp54 (SFRS11), a regulator for tau exon 10 alternative splicing identified by an expression cloning strategy. Mol Cell Biol. 26(18):6739-6747.                                                                                                               | Construct of Tau MAPT [4137] EX9 - INT9 - EX10 - INT10 - EX11 with GFP cDNA inserted into EX11.                                       | In vivo splicing in HEK293.                          | Positive clones identified by fluorescenceactivated cell sorting and visual inspection. Confirmed by UV crosslink, immunoprecipitation, SDS-PAGE. |
| 72-76    | HTra2alpha   | AAGAA               | 7     | Gene Name and Synonymous: TRA2A, transformer-2 alpha, HSU53209.                                                                                                              | 9546399   | Tacke R, Tohyama M, Ogawa S, Manley JL. (1998) Human Tra2 proteins are sequence-specific activators of premRNA splicing. Cell. 93(1): 139-148.                                                                                                                                                               | Sequences of 20 nt random for SELEX. Sequence of beta-globin [3043] and constructs of murine IgM-based premRNA for in vitro splicing. | In vitro splicing in HeLa S100 and nuclear extracts. | SELEX of 20nt random with recombinant protein, confirmed by EMSA in HeLa nuclear extract and S100. EMSA with recombinant protein.                 |
| 72-76    | hnRNP H1     | AAGAA               | -2    | Gene Name and Synonymous: HNRNPH1, heterogeneous nuclear ribonucleoprotein H1 (H), HNRPH, HNRPH1, hnRNP, DKFZp686A15170.                                                     | 17337441  | Schaub MC, Lopez SR, Caputi M. (2007) Members of the heterogeneous nuclear ribonucleoprotein H family activate splicing of an HIV-1 splicing substrate by promoting formation of ATP-dependent spliceosomal complexes. J Biol Chem. 282(18):13617-13626.                                                     | Synthesized sequences                                                                                                                 |                                                      | RNA-affinity chromatography assays with HeLa NE and immunoblotting or with recombinant protein.                                                   |
| 72-76    | hnRNP H2     | AAGAA               | -2    | Gene Name and Synonymous: HNRNPH2, heterogeneous nuclear                                                                                                                     | 17337441  | Schaub MC, Lopez SR, Caputi M. (2007) Members of the heterogeneous nuclear                                                                                                                                                                                                                                   | Synthesized sequences                                                                                                                 |                                                      | RNA-affinity chromatography assays with HeLa NE and immunoblotting or with recombinant                                                            |

|       |      |       |   |                                                                                                                                                                                                   |          |                                                                                                                                                                               |                                                                     |                                              |                                                   |
|-------|------|-------|---|---------------------------------------------------------------------------------------------------------------------------------------------------------------------------------------------------|----------|-------------------------------------------------------------------------------------------------------------------------------------------------------------------------------|---------------------------------------------------------------------|----------------------------------------------|---------------------------------------------------|
|       |      |       |   | ribonucleoprotein H2 (H'), FTP3, HNRPH', HNRPH2, hnRNP H'.                                                                                                                                        |          | ribonucleoprotein H family activate splicing of an HIV-1 splicing substrate by promoting formation of ATP-dependent spliceosomal complexes. J Biol Chem. 282(18):13617-13626. |                                                                     |                                              | protein.                                          |
| 73-77 | SC35 | AGAAG | 7 | Gene Name and Synonymous: SFRS2, splicing factor arginine/serine-rich 2, SC-35, SFRS2A, SRp30b, PR264. SC35 accelerates transcriptional elongation (cotranscriptional splicing) (PMID: 18641664). | 11847131 | Caputi M, Zahler AM. (2002) SR proteins and hnRNP H regulate the splicing of the HIV-1 tev-specific exon 6D. EMBO J. 21(4): 845-855.                                          | Construct of HIV-1 env [155971] EX_6D and part of flanking introns. | In vitro splicing with HeLa nuclear extracts | RNA affinity chromatography assay and immunoblot. |

#### Binding sites present ONLY in the second (MUTATED) sequence

| Position | Protein Name | Recognized Sequence | Score | Protein Notes                                                                                                                                                                                                          | PubMed ID | Reference                                                                                                                                                                                                            | Gene/Construct (Target RNA)                                                                 | Splicing Assay                                       | Binding Assay                                                                                           |
|----------|--------------|---------------------|-------|------------------------------------------------------------------------------------------------------------------------------------------------------------------------------------------------------------------------|-----------|----------------------------------------------------------------------------------------------------------------------------------------------------------------------------------------------------------------------|---------------------------------------------------------------------------------------------|------------------------------------------------------|---------------------------------------------------------------------------------------------------------|
| 71-77    | hnRNP A1     | GAGGAAG             | 5     | Gene Name and Synonymous: HNRNPA1, heterogeneous nuclear ribonucleoprotein A1, HNRPA1, MGC102835. hnRNP A1 carries bidirectional shuttling signals that serve for both nuclear localization and export (PMID:8521471). | 23430061  | Oh HK, Lee E, Jang HN, Lee J, Moon H, Sheng Z, Jun Y, Loh TJ, Cho S, Zhou J, Green MR, Zheng X, Shen H. (2013) hnRNP A1 contacts exon 5 to promote exon 6 inclusion of apoptotic Fas gene. Apoptosis. 18(7):825-835. | Constructs of wt or mutated FAS [355] EX5 - INT5 - EX6 - INT6 - EX7. Synthesized sequences. | In vivo splicing in HeLa, HCT-116, MDAMB-231.        | In vivo splicing using wt and mutated sequences in MDA-MB-231, HeLa, HCT-116                            |
| 72-76    | SRp30c       | AGGAA               | 2     | Gene Name and Synonymous: SFRS9, splicing factor arginine/serine-rich 9.                                                                                                                                               | 17548433  | Paradis C, Cloutier P, Shkreta L, Toutant J, Klarskov K, Chabot B. (2007) hnRNP I/PTB can antagonize the splicing repressor activity of SRp30c. RNA 13: 1287-1300.                                                   | Synthesized oligos. Sequences of 20nt random for SELEX.                                     | In vitro splicing with HeLa nuclear extracts, siRNA. | SELEX of 20nt random with recombinant protein. EMSA, UV crosslink, SDS-PAGE with HeLa nuclear extracts. |

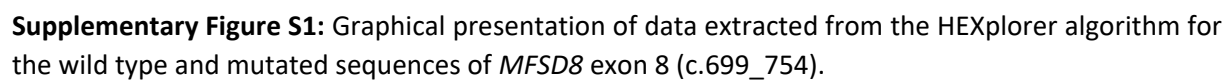

**Supplementary Figure S1:** Graphical presentation of data extracted from the HEXplorer algorithm for the wild type and mutated sequences of *MFSD8* exon 8 (c.699\_754).
